# Supplementary material
Source: Springer Nature journal article supplement (https://www.springermedizin.de/resource/supplementary/13058_2011_3159_MOESM9_ESM.pdf/9703330)

**A.**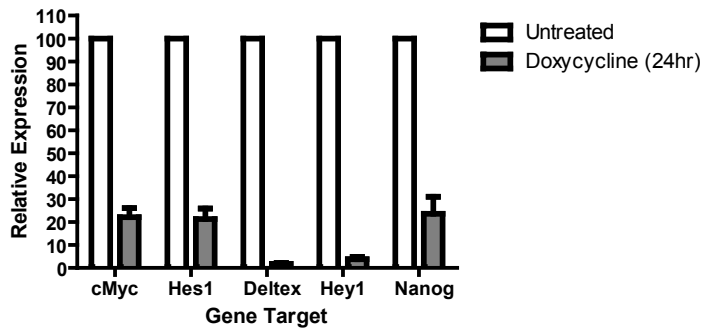**B.**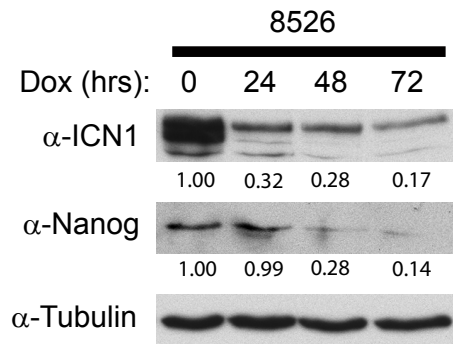**C.**

Cell Line 8542

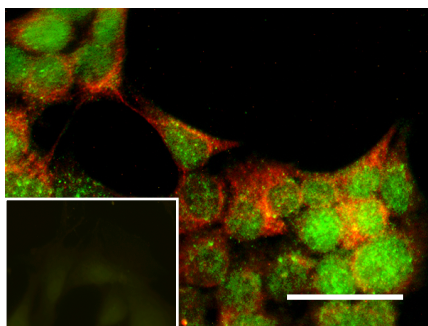

$\alpha$ -Keratin 8/18  
 $\alpha$ -Nanog

**D.**

Primary Tumorsphere Cells

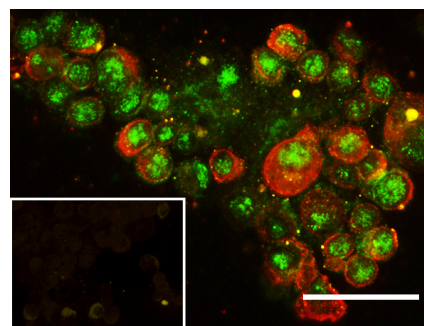

$\alpha$ -Keratin 8/18  
 $\alpha$ -Nanog

**E.**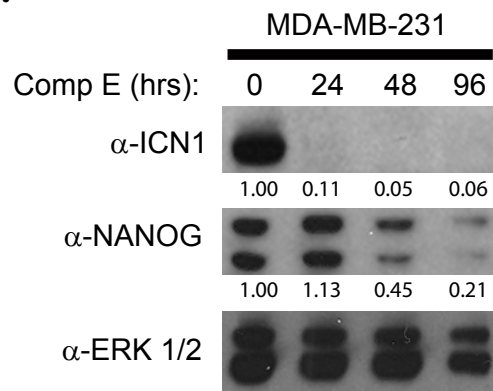

Supplement: MOESM9 [file 9703330]
